# Supplementary material
Source: Royal Society of Chemistry journal article supplement (doi:10.1039/d6qi00450d)
Supplement: d6qi00450d1.pdf [file d6qi00450d1.pdf]

Supporting Information

**Preservation of High-Pressure Synthesizes  
Pentazolate Anions *Cyclo-N<sub>5</sub>* Confined in *Sp<sup>3</sup>*-  
hybridized Boron Nitride**

Linlin Guo <sup>b</sup>, Shuang Liu <sup>a</sup>, Yuanyuan Liu <sup>a</sup>, Xu Guo <sup>a</sup>, Zitong Zhao <sup>a</sup>, Minghong Sui <sup>a</sup>,  
Ran Liu <sup>a</sup>, Bo Liu <sup>a</sup>, Thomas Wågberg <sup>c</sup>, Hamid Reza Barzegar <sup>c</sup>, Qing Liang <sup>d</sup>, Wei  
Zhang <sup>d</sup>, Ying Zhang <sup>a, \*</sup>, Zhen Yao<sup>a, \*</sup>, Peng Wang <sup>a, \*</sup>

<sup>a</sup> State Key Laboratory of High Pressure and Superhard Materials, Jilin University,  
Changchun, 130012, China

<sup>b</sup> Institute of Light Resources and Environmental Sciences, Henan Academy of  
Sciences, Zhengzhou, 460000, China

<sup>c</sup> Department of Physics, Umeå University, Umeå, Sweden

<sup>d</sup> Key Laboratory of Automobile Materials MOE, and School of Materials Science &  
Engineering, and Electron Microscopy Center, Jilin University, Changchun, 130012  
China

## Content

|                                    |   |
|------------------------------------|---|
| 1. Supplement Figures and Tables.. | 2 |
| 2. Refferences.....                | 8 |

### 1. Supplement Figures and Tables.

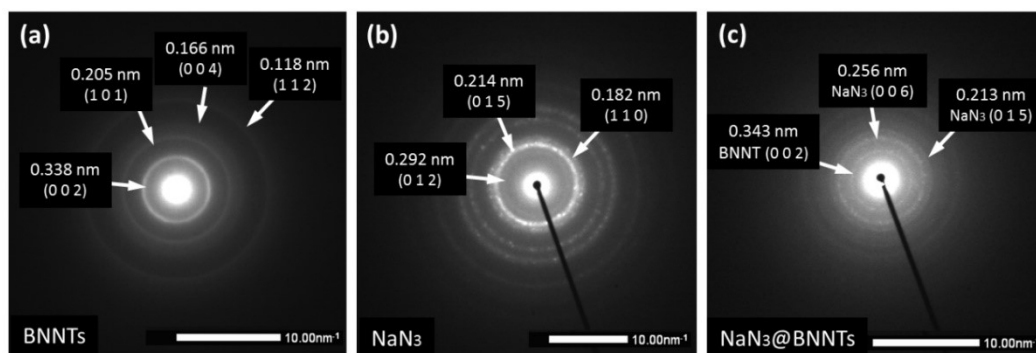

**Figure S1.** The SAED pattern of (a) BNNTs, (b) NaN<sub>3</sub> and (c) NaN<sub>3</sub>@BNNTs.

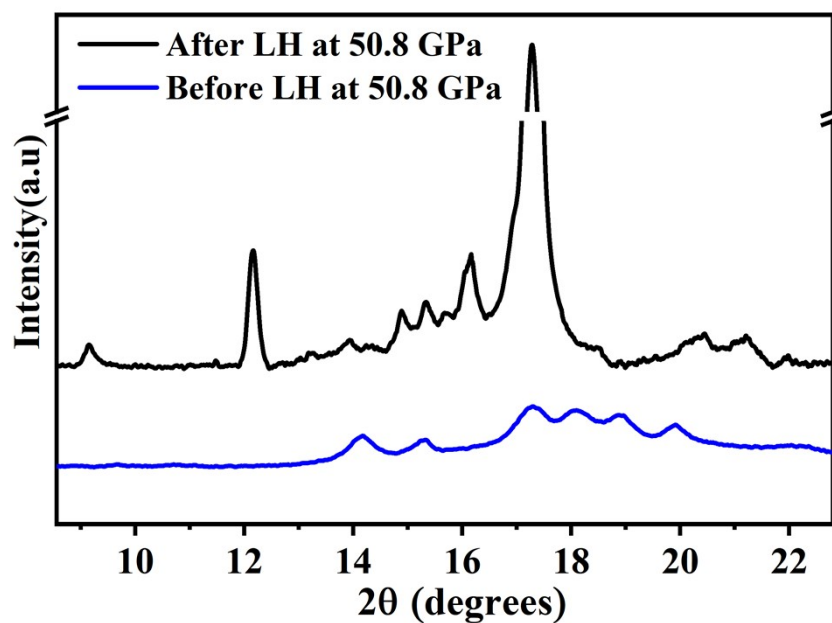

**Figure S2.** Experimental XRD patterns of NaN<sub>3</sub>@MWBNTs sample at 50.8 GPa before laser heating (LH) (blue curve) and of confined pentazole sodium after LH (black curve).

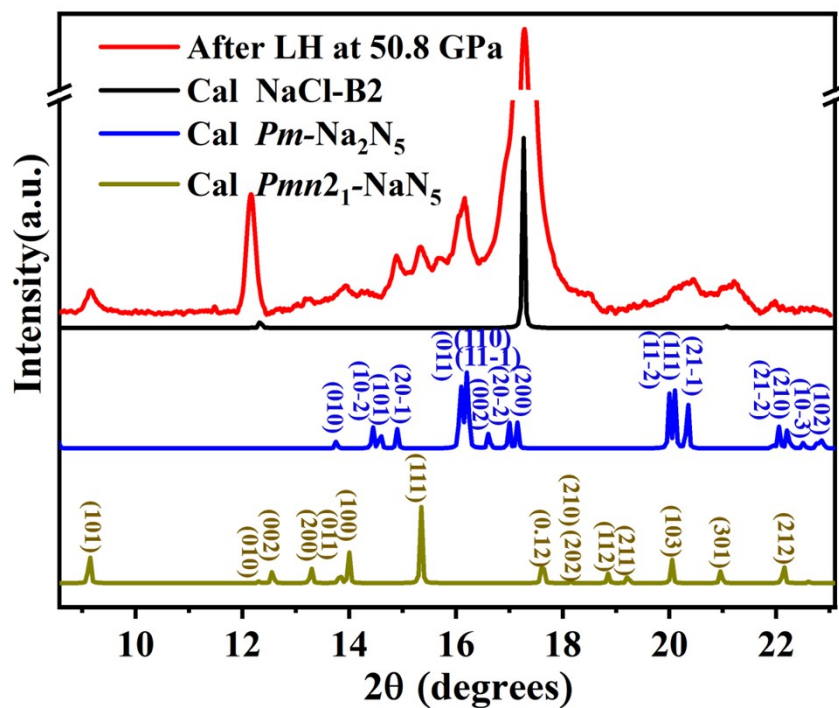

**Figure S3.** X-ray diffraction patterns of the confined sample taken at 50.8 GPa after laser heating (LH) compared to the calculated XRD pattern of the theoretical  $Pmn2_1\text{-NaN}_5$ ,  $Pm\text{-Na}_2\text{N}_5$  and NaCl-B2 crystal structure.

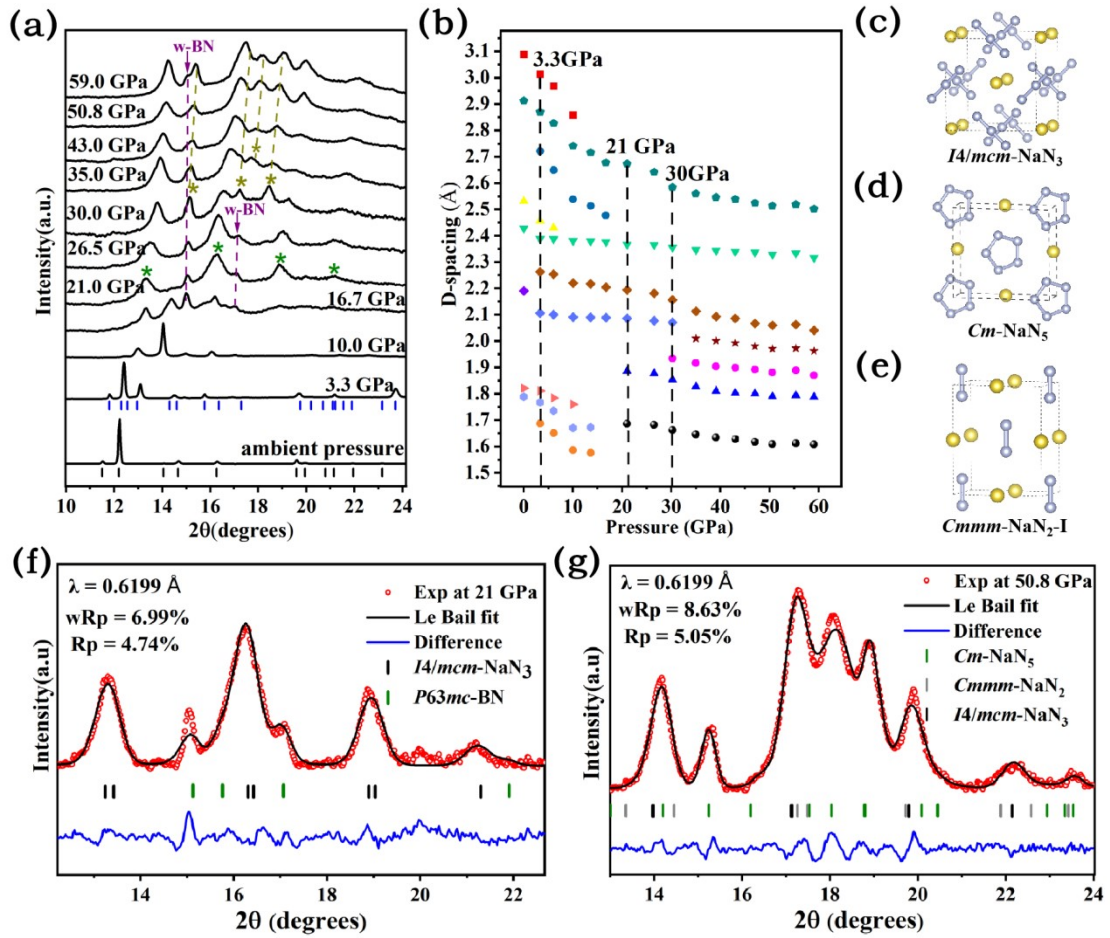

**Figure S4.** (a) Cold-compression experiments XRD patterns of NaN<sub>3</sub>@MWBNTs up to 59.0 GPa. Vertical black and blue ticks mark Bragg peaks positions of *R-3m*-NaN<sub>3</sub> and *C2/m*-NaN<sub>3</sub> respectively. The green and yellow asterisks mark represents the diffraction peaks of *I4/mcm*-NaN<sub>3</sub> and *Cm*-NaN<sub>5</sub>, respectively. The yellow and purple dash lines represented are guides for the diffraction peaks of *Cm*-NaN<sub>5</sub> and *w-BN*. (b) The d-spacing variation under pressure of confined sample at room temperature. The black dash lines represents the phase transition pressure observed in the Cold-compression experiments. The crystal structure of the (c) *I4/mcm*-NaN<sub>3</sub>, (d) *Cm*-NaN<sub>5</sub>, and (e) *Cmmm*-NaN<sub>2</sub>-I. Le Bail refinement of integrated X-ray diffraction pattern obtained from the confined sample at (f) 21 GPa and (g) 50.8 GPa.

Cold-compression experiments of NaN<sub>3</sub>@MWBNTs were performed up to 59.0 GPa at room temperature (Figure S2a). At ambient pressure, NaN<sub>3</sub> confined in MWBNTs shows a typical rhombohedral structure with *R-3m* space group

symmetry (ICSD #1144). Le Bail refinement of the experimental XRD pattern was performed for the confined  $\text{NaN}_3$  and the lattice parameters were provided (Table S1). Phase transition from  $R\text{-}3m\text{-NaN}_3$  to  $C2/m\text{-NaN}_3$  was observed at 3.3 GPa. Above 16.7 GPa, two diffraction peaks appeared at  $\sim 15$  and  $17^\circ$  (masked by purple dash lines), which can be attributed to the (100) and (002) reflections in w-BN <sup>2-4</sup>. Then at 21.0 GPa, the diffraction peaks of  $C2/m\text{-NaN}_3$  disappear gradually and four new peaks appear (marked by green asterisks), indicating the second phase transition from monoclinic  $C2/m\text{-NaN}_3$  to tetragonal  $I4/mcm\text{-NaN}_3$  (Figure S2c and f) <sup>5</sup>. With compressing to 30-35 GPa, three diffraction peaks of  $I4/mcm\text{-NaN}_3$  (around  $16.34$ ,  $19.01$ , and  $21.19^\circ$ ) become much weaker and four new diffraction peaks appear (marked by yellow asterisks). Le-Bail fits of the diffraction pattern at 50.8 GPa (Figure S2g) indicating that under cold compression, the confined  $I4/mcm\text{-NaN}_3$  begins to partially transform above 30.0 GPa, yielding a mixture of  $Cm\text{-NaN}_5$  and  $Cmmm\text{-NaN}_2$  (Figure S2d and e), as Zhou et al. Reported <sup>6</sup>. This three-phase coexistence ( $I4/mcm\text{-NaN}_3$ ,  $Cm\text{-NaN}_5$ , and  $Cmmm\text{-NaN}_2$ ) persists throughout the compression process up to our maximum pressure of 59.0 GPa. The crystallographic data of  $Cmmm\text{-NaN}_2$  and  $Cm\text{-NaN}_5$  unit cells at 50.8 GPa are listed in Table S2.

During the compress process, the  $sp^3$ -bonded w-BN capsule with super hardness and strength act as a pressure shield, increasing the phase transition pressures of  $\text{NaN}_3$ . Zhou et al. reported two phase transitions in  $\text{NaN}_3$ : (1) from  $C2/m\text{-NaN}_3$  to  $I4/mcm\text{-NaN}_3$  at 15.5 GPa, and (2)  $I4/mcm\text{-NaN}_3$  to  $Cm\text{-NaN}_5$  and  $Cmmm\text{-NaN}_2$  above 19.6 GPa <sup>6</sup>. In contrast, our work reveals that under confinement, the phase transitions occur at notably higher pressures: the  $C2/m \rightarrow I4/mcm$  transition shifts to 21 GPa, and the  $I4/mcm \rightarrow Cm + Cmmm$  transition occurs at 30 GPa. This represents a substantial pressure increase of 5.5 GPa and 10.4 GPa, respectively, compared to the unconfined sample, demonstrating the significant confinement effect of  $sp^3$ -hybridized BN encapsulation under high pressure.

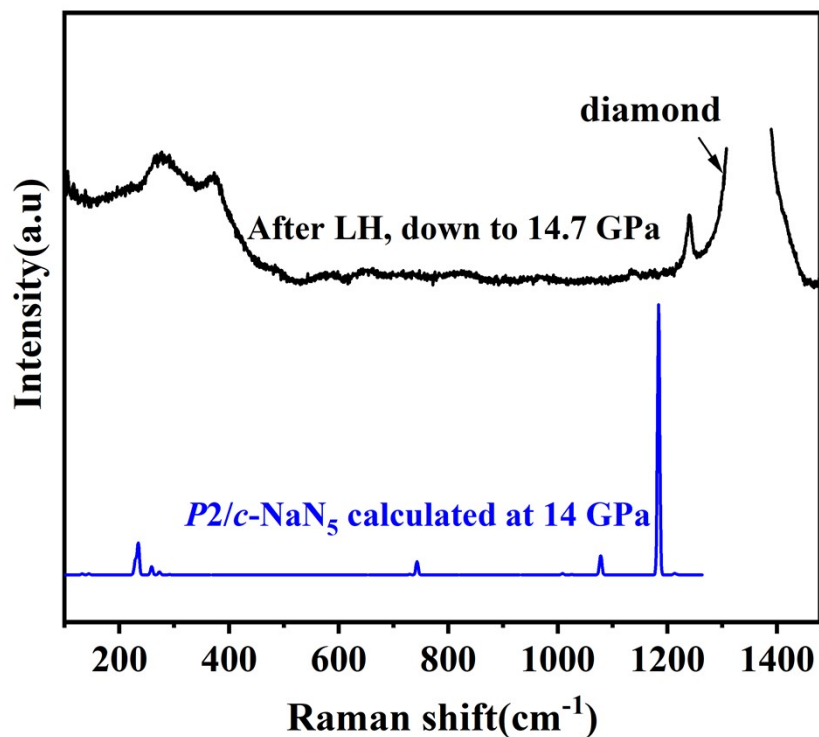

**Figure S5.** Experimental Raman spectrum of the laser-heated sample down to 14.7 GPa (black curve) compared with theoretical Raman spectra of  $P2/c\text{-NaN}_5$  (blue line) at 14 GPa.

**Table S1.** Lattice constant for the pure  $\text{NaN}_3$  and confined  $\text{NaN}_3$  under ambient condition.

|                                              | Space group | a=b (Å)  | c (Å)     | V (Å <sup>3</sup> ) |
|----------------------------------------------|-------------|----------|-----------|---------------------|
| <b><math>\text{NaN}_3</math>(ICSD #1144)</b> | R-3m        | 3.646(0) | 15.223(0) | 175.2(5)            |
| <b>Confined <math>\text{NaN}_3</math></b>    | R-3m        | 3.639(1) | 15.207(8) | 174.4(2)            |

**Table S2.** Crystallographic Data for the  $I4/mcm$ -NaN<sub>3</sub>,  $Cmmm$ -NaN<sub>2</sub>,  $Cm$ -NaN<sub>5</sub>, obtained from our experiments and Ref.38.

|                 | $I4/mcm$ -NaN <sub>3</sub> |          | $Cmmm$ -NaN <sub>2</sub> |          | $Cm$ -NaN <sub>5</sub> |          |
|-----------------|----------------------------|----------|--------------------------|----------|------------------------|----------|
| <b>Pressure</b> | 50.8 GPa                   | 57.9 GPa | 50.8 GPa                 | 57.9 GPa | 50.8 GPa               | 57.9 GPa |
|                 | This work                  | Ref.38   | This work                | Ref.38   | This work              | Ref.38   |
| <b>a (Å)</b>    | 5.102(3)                   | 5.021(3) | 4.130(1)                 | 4.078(1) | 6.210(7)               | 6.167(4) |
| <b>b (Å)</b>    | 5.102(3)                   | 5.021(2) | 4.929(7)                 | 4.854(4) | 5.471(7)               | 5.345(1) |
| <b>c (Å)</b>    | 5.092(1)                   | 5.012(2) | 2.668(1)                 | 2.621(1) | 2.922(8)               | 2.871(2) |
| <b>β (deg)</b>  | 90                         | 90       | 90                       | 90       | 78.112(1)              | 78.07(2) |

**Table S3.** Crystallographic Data for the  $Pmn2_1$ -NaN<sub>5</sub>,  $Pm$ -Na<sub>2</sub>N<sub>5</sub> and  $P2/c$ -NaN<sub>5</sub> obtained from our experiments and calculations..

|                 | $Pmn2_1$ -NaN <sub>5</sub> |             | $Pm$ -Na <sub>2</sub> N <sub>5</sub> |             | $P2/c$ -NaN <sub>5</sub> |             |
|-----------------|----------------------------|-------------|--------------------------------------|-------------|--------------------------|-------------|
| <b>Pressure</b> | 50.8 GPa                   | Cal. 50 GPa | 50.8 GPa                             | Cal. 50 GPa | 14.7 GPa                 | Cal. 15 GPa |
| <b>a (Å)</b>    | 5.359(3)                   | 5.440(1)    | 4.779(5)                             | 4.645(6)    | 7.631(1)                 | 7.862(2)    |
| <b>b (Å)</b>    | 2.891(4)                   | 2.847(5)    | 2.588(1)                             | 2.595(1)    | 4.912(3)                 | 5.121(5)    |
| <b>c (Å)</b>    | 5.665(7)                   | 5.671(8)    | 4.935(6)                             | 4.811(8)    | 5.750(5)                 | 5.947(6)    |
| <b>β (deg)</b>  | 90                         | 90          | 90                                   | 90          | 147.874(4)               | 149.580(6)  |

## 2. Refferencs.

- (1) Fathalizadeh, A.; Pham, T.; Mickelson, W.; Zettl, A. Scaled Synthesis of Boron Nitride Nanotubes, Nanoribbons, and Nanococoons Using Direct Feedstock Injection into an Extended-Pressure, Inductively-Coupled Thermal Plasma. *Nano. Lett.* **2014**, *14*, 4881.
- (2) Muthu, D. V. S.; Midgley, A. E.; Petruska, E. A.; Sood, A. K.; Bando, Y.; Golberg, D.; Kruger, M. B. High-pressure effects on boron nitride multi-walled nanotubes: An X-ray diffraction study. *Chem. Phys. Lett.* **2008**, *466*, 205-208.
- (3) Dong, Z.; Song, Y. Transformations of cold-compressed multiwalled boron nitride nanotubes probed by infrared spectroscopy. *J. Phys. Chem. C.* **2010**, *114*, 1782-1788.
- (4) Ji, C.; Levitas, V. I.; Zhu, H.; Chaudhuri, J.; Marathe, A.; Ma, Y. Shear-induced phase transition of nanocrystalline hexagonal boron nitride to wurtzitic structure at room temperature and lower pressure. *PNAS.* **2012**, *109*, 19108-19112.
- (5) Zhu, H.; Zhang, F.; Ji, C.; Hou, D.; Wu, J.; Hannon, T.; Ma, Y. Pressure-induced series of phase transitions in sodium azide. *J. Appl. Phys.* **2013**, *113*, 033511.
- (6) Zhou, M.; Liu, S.; Du, M.; Shi, X.; Zhao, Z.; Guo, L.; Liu, B.; Liu, R.; Wang, P.; Liu, B. High-pressure-induced structural and chemical transformations in  $\text{NaN}_3$ . *J. Phys. Chem. C.* **2020**, *124*, 19904-19910.
